# Supplementary material for: Highly sensitive and ultrafast read mapping for RNA-seq analysis
Source: PubMed Central journal article supplement — DNA Res. 2016 Jan 5;23(2):93–100. doi: 10.1093/dnares/dsv039 (PMC4833417; doi:10.1093/dnares/dsv039), 2016-01-05
Supplement: supp_dsv039_dsv039supp.pdf [file supp_dsv039_dsv039supp.pdf]

## Highly sensitive and ultrafast read mapping for RNA-seq analysis

Medina, I., Tárraga, J., Martínez, H., Barrachina, S., Castillo, M.I., Paschall, J., Salavert-Torres, J., Blanquer-Espert, I., Hernández-García, V., Quintana-Ortí, E.S. & Dopazo, J.

## Supplementary Data

### Default command line parameters for the programs:

```
python mapsplICE.py -c ~/GENOMES/MAP_SPLICE/ -x ~/GENOMES/MAP_SPLICE/hs.73 -1 <fastq-input-file> -p 12 -o <output-dir>
```

```
STAR --genomeDir ~/GENOMES/STAR/ --readFilesIn <fastq-input-file> --runThreadN 12 --outFileNamePrefix <output-dir>
```

```
tophat2 -p 12 --no-sort-bam -o <output-dir> ~/GENOMES/BOWTIE2/hs.73 <fastq-input-file>
```

```
~/HISAT/hisat-0.1.6-beta/hisat --novel-splicesite-outfile Junction.bed -p 12 -x ~/GENOMES/HISAT_INDEX/hs.73 reads.fq -S results.sam
```

```
hpg-aligner rna -i ~/GENOME /HPG-ALIGNER -f <fastq-input-file> -o <output-dir>
```
