# Supplementary material for: Highly sensitive and ultrafast read mapping for RNA-seq analysis
Source: PubMed Central journal article supplement — DNA Res. 2016 Jan 5;23(2):93–100. doi: 10.1093/dnares/dsv039 (PMC4833417; doi:10.1093/dnares/dsv039), 2016-01-05
Supplement: supp_dsv039_dsv039supp_tables.pdf [file supp_dsv039_dsv039supp_tables.pdf]

## **Highly sensitive and ultrafast read mapping for RNA-seq analysis**

Medina, I., Tárraga, J., Martínez, H., Barrachina, S., Castillo, M.I., Paschall, J., Salavert-Torres, J., Blanquer-Espert, I., Hernández-García, V., Quintana-Ortí, E.S. & Dopazo, J.

### Supplementary Tables

**Supplementary Table 1. Benchmarking for the simulated dataset containing 10 million single-end reads simulated with the *dwgsim* program.** First column, RL, indicated read length in bps. Second column represents the mutation rate (MR). For each program the table contains the following columns with the percentages of: IMR: incorrectly mapped reads, RNM: reads not mapped, CMR: correctly mapped reads covering the corresponding splice junctions. The last column, T, represent runtimes to produce a BAM file in minutes.

| RL  | MR  | HPG Aligner 1 |      |       |       | HISAT |       |       |      | STAR 2 |       |       |       | TopHat 2 + Bowtie 2 |       |       |        | MapSplice 2 |       |       |       |
|-----|-----|---------------|------|-------|-------|-------|-------|-------|------|--------|-------|-------|-------|---------------------|-------|-------|--------|-------------|-------|-------|-------|
|     |     | IMR           | RNM  | CMR   | T     | IMR   | RNM   | CMR   | T    | IMR    | RNM   | CMR   | T     | IMR                 | RNM   | CMR   | T      | IMR         | RNM   | CMR   | T     |
| 50  | 0.1 | 5.09          | 2.80 | 92.11 | 2.80  | 1.02  | 18.39 | 80.59 | 2.68 | 10.34  | 3.06  | 86.60 | 6.62  | 1.81                | 11.33 | 86.86 | 292.00 | 3.35        | 4.96  | 91.69 | 24.20 |
|     | 1   | 5.59          | 4.46 | 89.95 | 3.90  | 1.10  | 24.40 | 74.5  | 2.74 | 10.44  | 4.98  | 84.58 | 6.90  | 1.70                | 18.37 | 79.93 | 395.00 | 3.27        | 8.88  | 87.85 | 23.70 |
|     | 2   | 6.86          | 6.31 | 86.83 | 3.60  | 1.14  | 31.22 | 67.64 | 2.83 | 10.43  | 7.64  | 81.93 | 10.90 | 1.57                | 27.14 | 71.29 | 443.00 | 3.17        | 14.01 | 82.82 | 25.40 |
| 75  | 0.1 | 4.50          | 0.61 | 94.89 | 3.80  | 0.58  | 8.19  | 91.23 | 3.10 | 11.91  | 1.36  | 86.73 | 6.83  | 1.08                | 22.90 | 76.02 | 53.50  | 5.46        | 1.45  | 93.09 | 29.60 |
|     | 1   | 5.26          | 1.17 | 93.57 | 3.60  | 0.60  | 13.60 | 85.8  | 3.20 | 12.44  | 2.64  | 84.92 | 6.60  | 0.92                | 35.19 | 63.89 | 54.30  | 6.90        | 3.35  | 89.75 | 28.50 |
|     | 2   | 6.26          | 2.30 | 91.44 | 5.00  | 0.60  | 20.98 | 78.42 | 3.28 | 12.77  | 4.53  | 82.70 | 10.50 | 0.76                | 48.42 | 50.82 | 56.00  | 8.57        | 6.48  | 84.95 | 32.10 |
| 100 | 0.1 | 4.13          | 0.34 | 95.53 | 5.30  | 0.43  | 8.90  | 90.67 | 3.97 | 11.94  | 0.98  | 87.08 | 7.75  | 0.72                | 36.71 | 62.57 | 75.20  | 7.48        | 0.58  | 91.94 | 36.40 |
|     | 1   | 4.92          | 0.65 | 94.43 | 5.60  | 0.46  | 16.00 | 83.54 | 4.18 | 12.67  | 2.24  | 85.09 | 7.08  | 0.57                | 52.44 | 46.99 | 80.30  | 11.75       | 1.33  | 86.92 | 38.30 |
|     | 2   | 5.96          | 1.42 | 92.62 | 5.50  | 0.44  | 25.85 | 73.71 | 4.16 | 13.19  | 4.14  | 82.67 | 10.20 | 0.43                | 66.93 | 32.64 | 85.50  | 16.05       | 2.63  | 81.32 | 40.15 |
| 150 | 0.1 | 4.27          | 0.40 | 95.33 | 5.90  | 0.34  | 15.13 | 84.53 | 5.26 | 12.38  | 0.53  | 87.09 | 8.18  | 0.35                | 62.07 | 37.58 | 130.60 | 19.87       | 0.69  | 79.44 | 47.50 |
|     | 1   | 5.08          | 0.78 | 94.14 | 6.50  | 0.31  | 28.65 | 71.04 | 5.13 | 13.38  | 1.54  | 85.08 | 9.07  | 0.23                | 77.82 | 21.95 | 142.40 | 25.53       | 1.06  | 73.41 | 47.00 |
|     | 2   | 6.02          | 1.43 | 92.55 | 6.00  | 0.16  | 45.27 | 54.57 | 5.14 | 15.33  | 3.26  | 81.41 | 13.00 | 0.10                | 88.56 | 11.34 | 84.50  | 21.49       | 1.54  | 76.97 | 43.40 |
| 250 | 0.1 | 4.09          | 0.70 | 95.21 | 9.00  | 0.15  | 39.01 | 60.84 | 6.38 | 11.38  | 0.63  | 87.99 | 11.95 | 0.08                | 89.67 | 10.25 | 252.00 | 42.49       | 0.26  | 57.25 | 61.95 |
|     | 1   | 4.87          | 1.66 | 93.47 | 9.30  | 0.10  | 63.40 | 36.5  | 4.28 | 13.76  | 2.09  | 84.15 | 12.33 | 0.04                | 96.55 | 3.41  | 208.00 | 47.02       | 0.32  | 52.66 | 62.20 |
|     | 2   | 6.42          | 3.15 | 90.43 | 8.00  | 0.04  | 82.18 | 17.78 | 6.00 | 16.90  | 5.08  | 78.02 | 16.70 | 0.01                | 99.06 | 0.93  | 155.00 | 40.22       | 0.38  | 59.40 | 58.40 |
| 400 | 0.1 | 3.98          | 1.23 | 94.79 | 9.60  | 0.02  | 78.75 | 21.23 | 8.06 | 14.30  | 1.57  | 84.13 | 19.40 | 0.02                | 99.00 | 0.98  | 374.20 | 56.35       | 0.04  | 43.61 | 81.10 |
|     | 1   | 4.89          | 3.37 | 91.74 | 10.00 | 0.01  | 93.82 | 6.17  | 8.11 | 18.28  | 6.56  | 75.16 | 20.20 | 0.00                | 99.87 | 0.13  | 382.40 | 57.41       | 0.05  | 42.54 | 83.00 |
|     | 2   | 6.51          | 6.59 | 86.90 | 12.80 | 0.00  | 98.78 | 1.22  | 8.31 | 22.23  | 18.59 | 59.18 | 21.40 | 0.00                | 99.99 | 0.01  | 271.00 | 56.83       | 0.05  | 43.12 | 85.20 |

**Supplementary Table 2. Benchmarking for the simulated dataset containing 10 million paired-end reads simulated with the dwgsim program.** First column, RL, indicated read length in bps. Second column represents the mutation rate (MR). For each program the table contains the following columns with the percentages of: IMR: incorrectly mapped reads, RNM: reads not mapped, CMR: correctly mapped reads covering the corresponding splice junctions. The last column, T, represent runtimes to produce a BAM file in minutes.

| RL  | MR  | HPG Aligner 1 |      |       |       |      | HISAT |       |       |       | STAR 2 |       |       |      | TopHat 2 + Bowtie 2 |       |        |       | MapSplice 2 |       |        |   |
|-----|-----|---------------|------|-------|-------|------|-------|-------|-------|-------|--------|-------|-------|------|---------------------|-------|--------|-------|-------------|-------|--------|---|
|     |     | IMR           | RNM  | CMR   | T     |      | IMR   | RNM   | CMR   | T     | IMR    | RNM   | CMR   | T    | IMR                 | RNM   | CMR    | T     | IMR         | RNM   | CMR    | T |
| 50  | 0.1 | 4.23          | 5.03 | 90.74 | 5.50  | 1.02 | 6.44  | 92.54 | 5.72  | 10.92 | 7.25   | 81.83 | 8.10  | 1.17 | 15.00               | 83.83 | 702.30 | 3.03  | 4.80        | 92.17 | 48.20  |   |
|     | 1   | 4.49          | 6.33 | 89.18 | 5.90  | 1.14 | 10.21 | 88.65 | 5.86  | 10.87 | 10.96  | 78.17 | 8.05  | 1.04 | 23.83               | 75.13 | 848.20 | 3.33  | 8.33        | 88.34 | 49.20  |   |
| 75  | 0.1 | 3.89          | 1.66 | 94.45 | 6.10  | 0.59 | 5.70  | 93.71 | 6.54  | 12.81 | 1.14   | 86.05 | 9.13  | 0.67 | 33.26               | 66.07 | 107.00 | 4.84  | 1.39        | 93.77 | 60.80  |   |
|     | 1   | 4.48          | 2.19 | 93.33 | 7.00  | 0.64 | 10.00 | 89.36 | 6.60  | 13.69 | 2.13   | 84.18 | 9.55  | 0.53 | 47.40               | 52.07 | 110.00 | 6.15  | 3.02        | 90.83 | 62.50  |   |
| 100 | 0.1 | 3.68          | 1.45 | 94.87 | 7.40  | 0.51 | 7.54  | 91.95 | 8.38  | 13.18 | 1.19   | 85.63 | 11.17 | 0.47 | 48.73               | 50.80 | 151.80 | 6.62  | 0.74        | 92.64 | 73.40  |   |
|     | 1   | 4.38          | 1.35 | 94.27 | 8.30  | 0.53 | 14.33 | 85.14 | 8.52  | 14.17 | 1.14   | 84.69 | 12.18 | 0.34 | 63.56               | 36.10 | 161.80 | 9.12  | 1.26        | 89.62 | 76.70  |   |
| 150 | 0.1 | 4.02          | 0.82 | 95.16 | 10.10 | 0.4  | 14.40 | 85.20 | 10.53 | 13.09 | 0.26   | 86.65 | 14.87 | 0.25 | 70.37               | 29.38 | 253.00 | 14.63 | 0.73        | 84.64 | 91.50  |   |
|     | 1   | 4.87          | 1.21 | 93.92 | 10.50 | 0.36 | 28.38 | 71.26 | 10.67 | 15.02 | 0.89   | 84.09 | 15.62 | 0.16 | 82.38               | 17.46 | 277.35 | 19.37 | 1.10        | 79.53 | 95.10  |   |
| 250 | 0.1 | 4.08          | 0.96 | 94.96 | 11.70 | 0.18 | 39.63 | 60.19 | 13.71 | 16.33 | 1.81   | 81.86 | 25.40 | 0.06 | 91.13               | 8.81  | 506.50 | 35.71 | 0.95        | 63.34 | 130.70 |   |
|     | 1   | 4.95          | 1.91 | 93.14 | 17.90 | 0.11 | 64.33 | 35.56 | 13.51 | 19.98 | 8.45   | 71.57 | 26.47 | 0.03 | 96.80               | 3.17  | 541.00 | 39.80 | 1.05        | 59.15 | 126.90 |   |
| 400 | 0.1 | 3.99          | 1.41 | 94.60 | 16.00 | 0.03 | 79.44 | 20.53 | 18.02 | 22.30 | 24.15  | 53.55 | 78.20 | 0.01 | 99.03               | 0.96  | 751.20 | 52.48 | 1.56        | 45.96 | 179.10 |   |
|     | 1   | 4.96          | 3.60 | 91.44 | 19.00 | 0.01 | 94.06 | 5.93  | 17.86 | 13.85 | 56.28  | 29.87 | 82.70 | 0.01 | 99.86               | 0.13  | 778.00 | 53.54 | 1.53        | 44.93 | 117.90 |   |
